# Supplementary material
Source: MDPI journal article supplement (https://www.mdpi.com/2304-6740/6/2/57)
Supplement: s1 [file s1]

Supplementary data to accompany:

# The versatile SALSAC approach to heteroleptic copper(I) dye assembly in dye-sensitized solar cells

Frederik J. Malzner, Catherine E. Housecroft and Edwin C. Constable\*

Department of Chemistry, University of Basel, Building 1096, Mattenstrasse 24a CH-4058 Basel, Switzerland

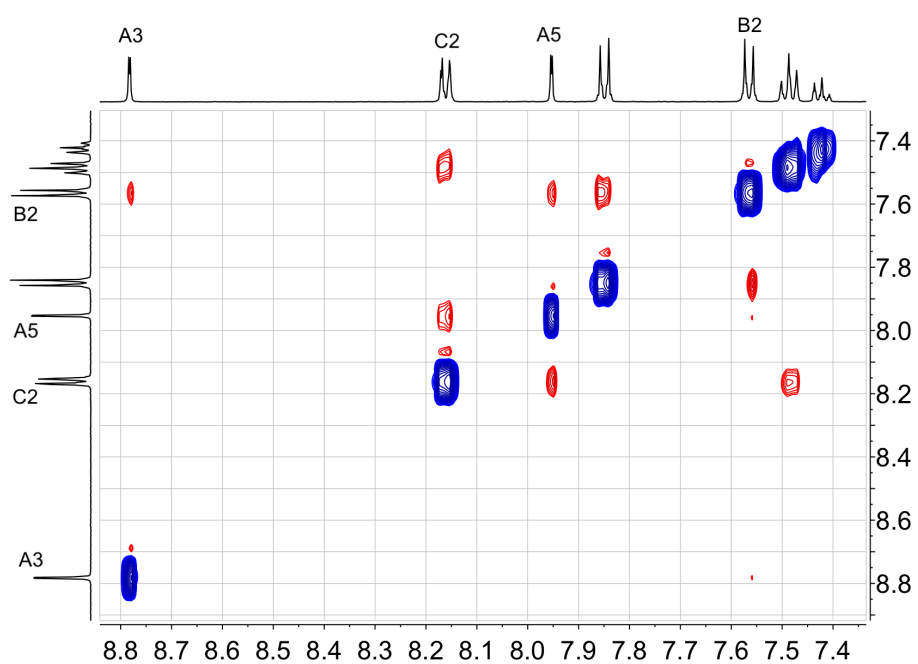

**Figure S1.** NOESY spectrum (500 MHz, 298 K, CD<sub>2</sub>Cl<sub>2</sub>) of 4. Chemical shifts in  $\delta$  / ppm.

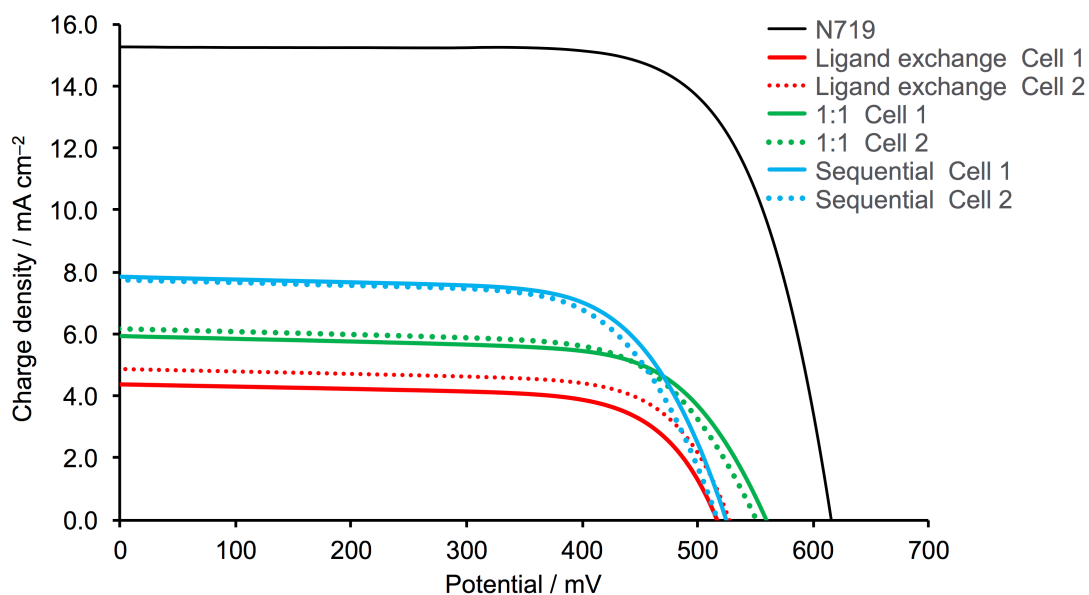

**Figure S2.**  $J$ - $V$  curves for duplicate DSSCs with photoanodes assembled using the three dipping methods (ligand exchange, 1:1 mixture and sequential) described in the Materials and Methods section compared to a DSSC sensitized with N719.

**Table S1.** EQE maxima for DSSCs (cell 2 in each case, see Table 3) with photoanodes assembled using the three assembly protocols described in the Materials and Methods section.

| Dye                     | Dipping procedure | On the day of DSSC fabrication |                        |
|-------------------------|-------------------|--------------------------------|------------------------|
|                         |                   | $\lambda_{\max}$ / nm          | EQE <sub>max</sub> / % |
| [Cu(3)(4)] <sup>+</sup> | Ligand exchange   | 480                            | 31.9                   |
| [Cu(3)(4)] <sup>+</sup> | 1 : 1             | 470                            | 49.1                   |
| [Cu(3)(4)] <sup>+</sup> | Sequential        | 480                            | 51.7                   |
| N719                    |                   | 540                            | 68.5                   |

  

| Dye                     | Dipping procedure | 3 days after DSSC fabrication |                        |
|-------------------------|-------------------|-------------------------------|------------------------|
|                         |                   | $\lambda_{\max}$ / nm         | EQE <sub>max</sub> / % |
| [Cu(3)(4)] <sup>+</sup> | Ligand exchange   | 470                           | 23.9                   |
| [Cu(3)(4)] <sup>+</sup> | 1 : 1             | 470                           | 47.8                   |
| [Cu(3)(4)] <sup>+</sup> | Sequential        | 480                           | 53.4                   |
| N719                    |                   | 530                           | 67.6                   |

  

| Dye                     | Dipping procedure | 7 days after DSSC fabrication |                        |
|-------------------------|-------------------|-------------------------------|------------------------|
|                         |                   | $\lambda_{\max}$ / nm         | EQE <sub>max</sub> / % |
| [Cu(3)(4)] <sup>+</sup> | Ligand exchange   | 470                           | 24.1                   |
| [Cu(3)(4)] <sup>+</sup> | 1 : 1             | 470                           | 48.1                   |
| [Cu(3)(4)] <sup>+</sup> | Sequential        | 470                           | 52.2                   |
| N719                    |                   | 540                           | 66.6                   |

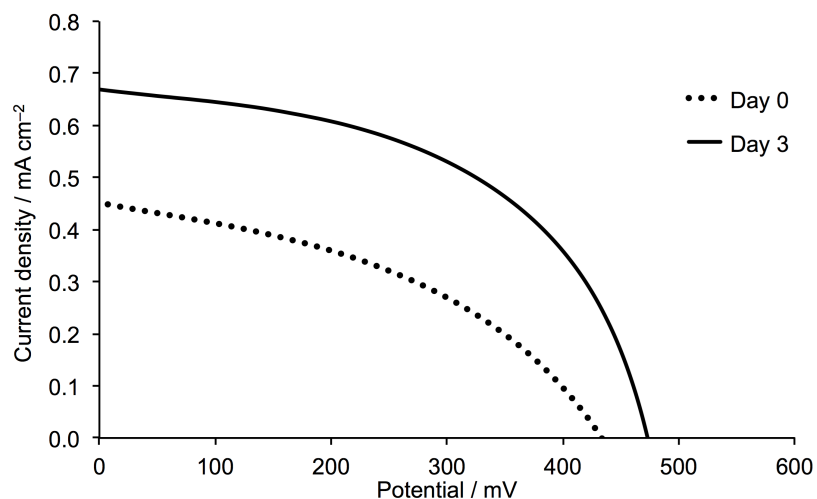

**Figure S3.** *J*-*V* curves of a DSSC in which the FTO/TiO<sub>2</sub> working electrode was immersed in a DMSO solution of anchor **3** (one day) followed by immersion in a MeCN solution of [Cu(MeCN)<sub>4</sub>][PF<sub>6</sub>] (one day). No ancillary ligand was used.

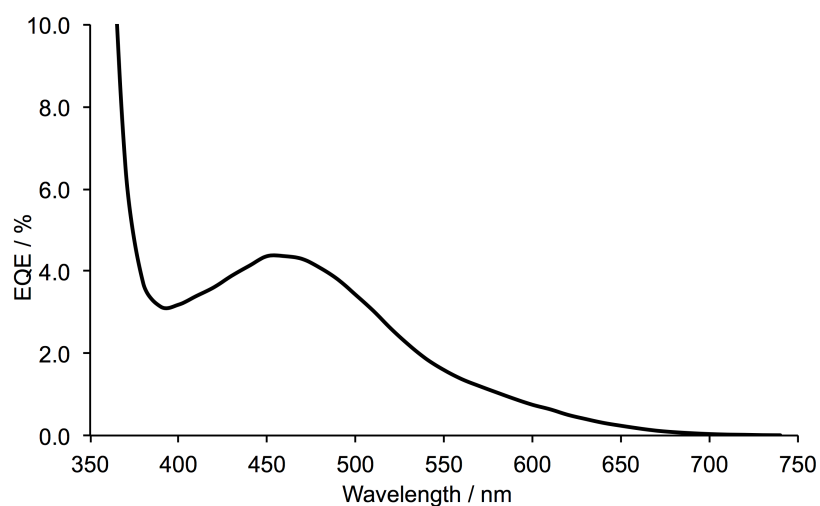

**Figure S4.** EQE spectrum of a DSSC in which the FTO/TiO<sub>2</sub> working electrode was immersed in a DMSO solution of anchor **3** (one day) followed by immersion in a MeCN solution of [Cu(MeCN)<sub>4</sub>][PF<sub>6</sub>] (one day). No ancillary ligand was used.

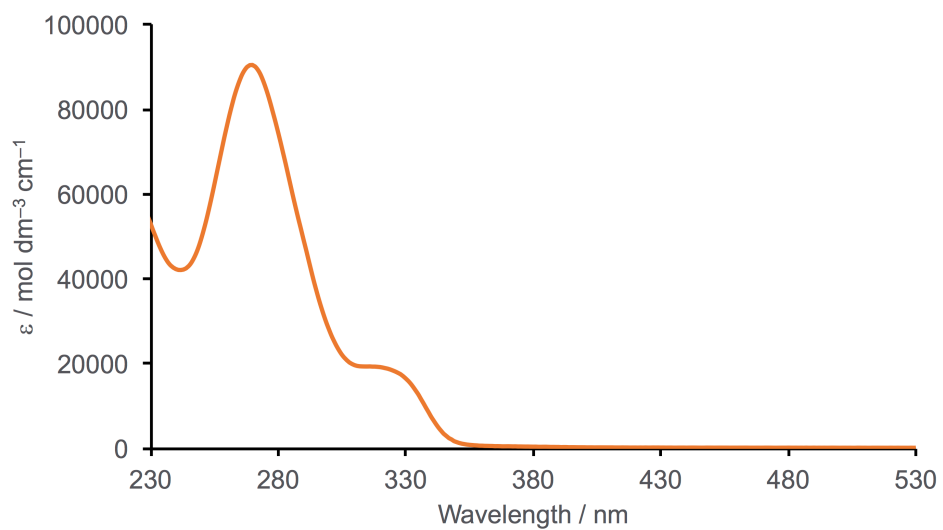

**Figure S5.** Solution absorption spectrum of compound **4** ( $\text{CH}_2\text{Cl}_2$ ,  $1 \times 10^{-5} \text{ mol dm}^{-3}$ ).
